# Supplementary material for: Continuous broadband emission from a metal–organic framework as a human-friendly white light source
Source: Royal Society of Chemistry journal article supplement (doi:10.1039/c6tc00839a), 2016-01-01
Supplement: c6tc00839a1.pdf [file c6tc00839a1.pdf]

## Supplementary Information

### Continuous Broadband Emission from a Metal–Organic Framework as Human-Friendly White Light Source

Muhammad Usman,<sup>a</sup> Golam Haider,<sup>b,c</sup> Shruti Mendiratta,<sup>a</sup> Tzuoo-Tsair Luo,<sup>a</sup> Yang-Fang Chen<sup>\*b</sup> and Kuang-Lieh Lu<sup>\*a</sup>

<sup>a</sup>Institute of Chemistry, Academia Sinica, Taipei 115, Taiwan. E-mail: kllu@gate.sinica.edu.tw

<sup>b</sup>Department of Physics, National Taiwan University, Taipei 106, Taiwan.

Email: yfchen@phys.ntu.edu.tw

<sup>c</sup>Nano Science and Technology Program, Taiwan International Graduate Program, Academia Sinica, Taipei 115, Taiwan & National Tsing Hua University, Hsinchu 300, Taiwan

#### Contents:

- Table S1** Crystal and structure refinement data for compound **1**.  
**Figure S1** Infrared spectra of 1,4,5,8-naphthalenetetracarboxylic acid hydrate (H<sub>4</sub>ntc) and compound **1**.  
**Figure S2** (a) Coordination environment of the metal and  
(b) 1,4,5,8-naphthalenetetracarboxylate monoanhydride (ntca).  
**Figure S3** Hydrogen bonding interactions in compound **1**.  
**Figure S4** Thermogravimetric diagram for compound **1**.  
**Figure S5** Powder X-ray diffraction patterns of **1** at ambient temperature.  
**Figure S6** Diffuse reflectance spectrum of compound **1**.  
**Figure S7** The ligand 1,4,5,8-naphthalenetetracarboxylic acid hydrate (H<sub>4</sub>ntc) exhibits blue light emission when excited at 266 nm with CIE coordinates at (0.201, 0.169).

**Table S1** Crystal and structure refinement data for compound **1**.

|                                                                                          |                                                                 |
|------------------------------------------------------------------------------------------|-----------------------------------------------------------------|
| Chemical formula                                                                         | C <sub>28</sub> H <sub>20</sub> O <sub>20</sub> Sr <sub>2</sub> |
| Formula weight (g/mol)                                                                   | 851.68                                                          |
| Crystal system                                                                           | Monoclinic                                                      |
| Space group                                                                              | <i>P</i> 2 <sub>1</sub> / <i>c</i>                              |
| Temperature (K)                                                                          | 200 (2)                                                         |
| <i>a</i> (Å)                                                                             | 8.9442(9)                                                       |
| <i>b</i> (Å)                                                                             | 25.154(2)                                                       |
| <i>c</i> (Å)                                                                             | 6.7966(7)                                                       |
| β (°)                                                                                    | 98.632(7)                                                       |
| <i>V</i> (Å <sup>3</sup> )                                                               | 1511.8(3)                                                       |
| <i>Z</i>                                                                                 | 2                                                               |
| <i>D</i> <sub>calcd</sub> (g/cm <sup>3</sup> )                                           | 1.871                                                           |
| θ range (°)                                                                              | 1.62 – 25.07                                                    |
| μ (mm <sup>-1</sup> )                                                                    | 3.623                                                           |
| <i>F</i> (000)                                                                           | 848                                                             |
| Reflns collected                                                                         | 9558                                                            |
| Unique reflns                                                                            | 2660                                                            |
| Parameters                                                                               | 230                                                             |
| <i>R</i> <sub>int</sub>                                                                  | 0.0580                                                          |
| <i>R</i> <sub>1</sub> , <i>wR</i> <sub>2</sub> <sup>a</sup> ( <i>I</i> > 2σ( <i>I</i> )) | 0.0496, 0.1169                                                  |
| <i>R</i> <sub>1</sub> , <i>wR</i> <sub>2</sub> <sup>a</sup> (all data)                   | 0.0702, 0.1276                                                  |
| GOF                                                                                      | 1.043                                                           |

$$^aR_1 = \frac{\sum ||F_0| - |F_c||}{\sum |F_0|} ; wR_2 = \left[ \frac{\sum w(F_0^2 - F_c^2)^2}{\sum w(F_0^2)^2} \right]^{1/2}$$

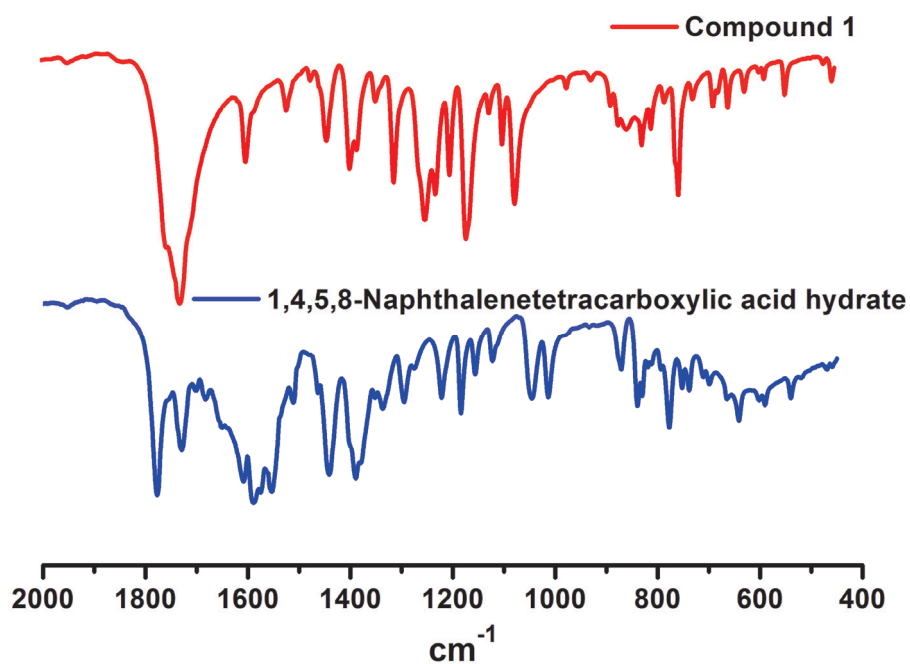

**Figure S1** Infrared spectra of 1,4,5,8-naphthalenetetracarboxylic acid hydrate (H<sub>4</sub>ntc) and compound **1**.

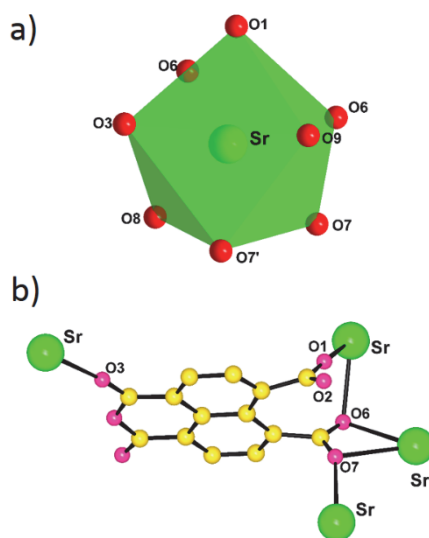

**Figure S2** (a) Coordination environment of the metal center and (b) 1,4,5,8-naphthalenetetracarboxylate monoanhydride (ntca) ligand.

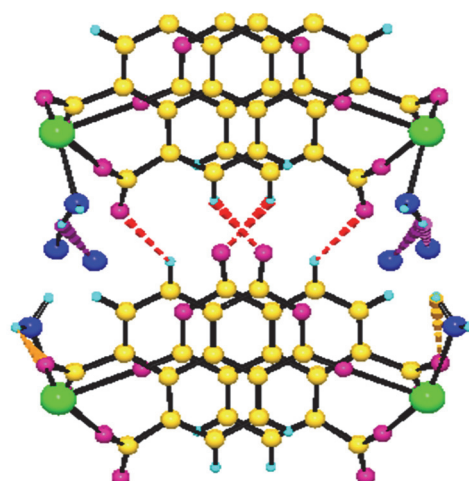

**Figure S3** Hydrogen bonding interactions in compound 1.

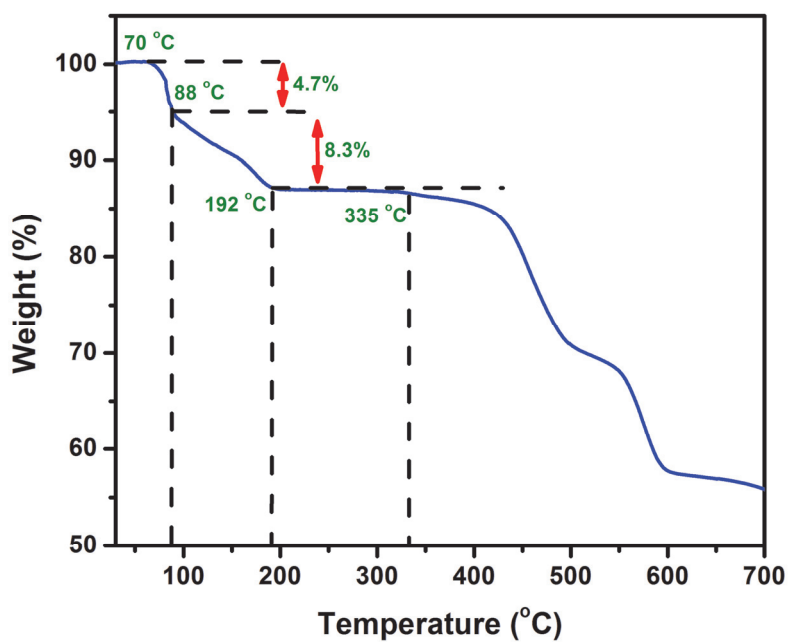

**Figure S4** Thermogravimetric diagram for compound 1.

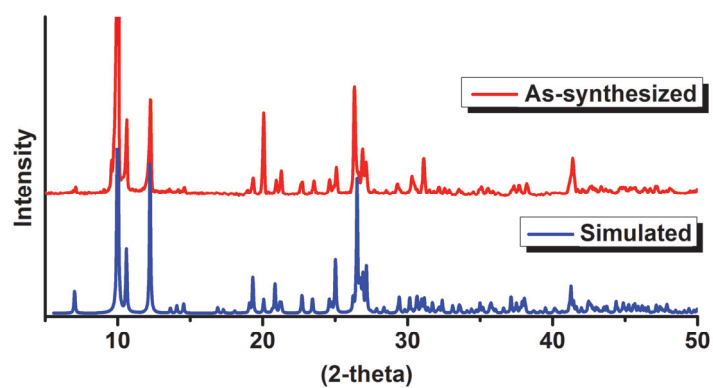

**Figure S5** Powder X-ray diffraction patterns of **1** at ambient temperature.

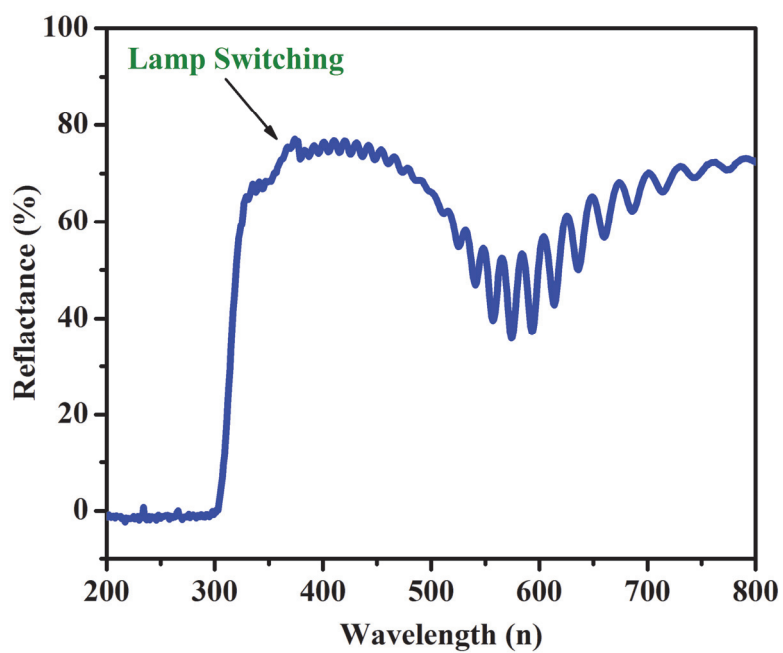

**Figure S6** Diffuse reflectance spectrum of compound **1**. The noise is due to changing the lamp.

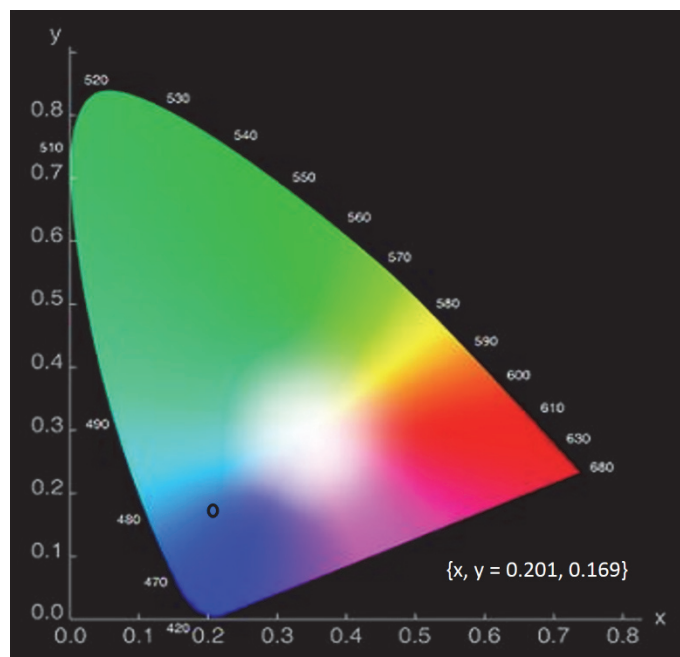

**Figure S7** The ligand 1,4,5,8-naphthalenetetracarboxylic acid hydrate ( $H_4ntc$ ) exhibits blue light emission when excited at 266 nm with CIE coordinates at (0.201, 0.169).
